# Supplementary material
Source: PubMed Central journal article supplement (PMC8688671)
Supplement: 12079_2021_637_MOESM2_ESM.pdf [file 12079_2021_637_MOESM2_ESM.pdf]

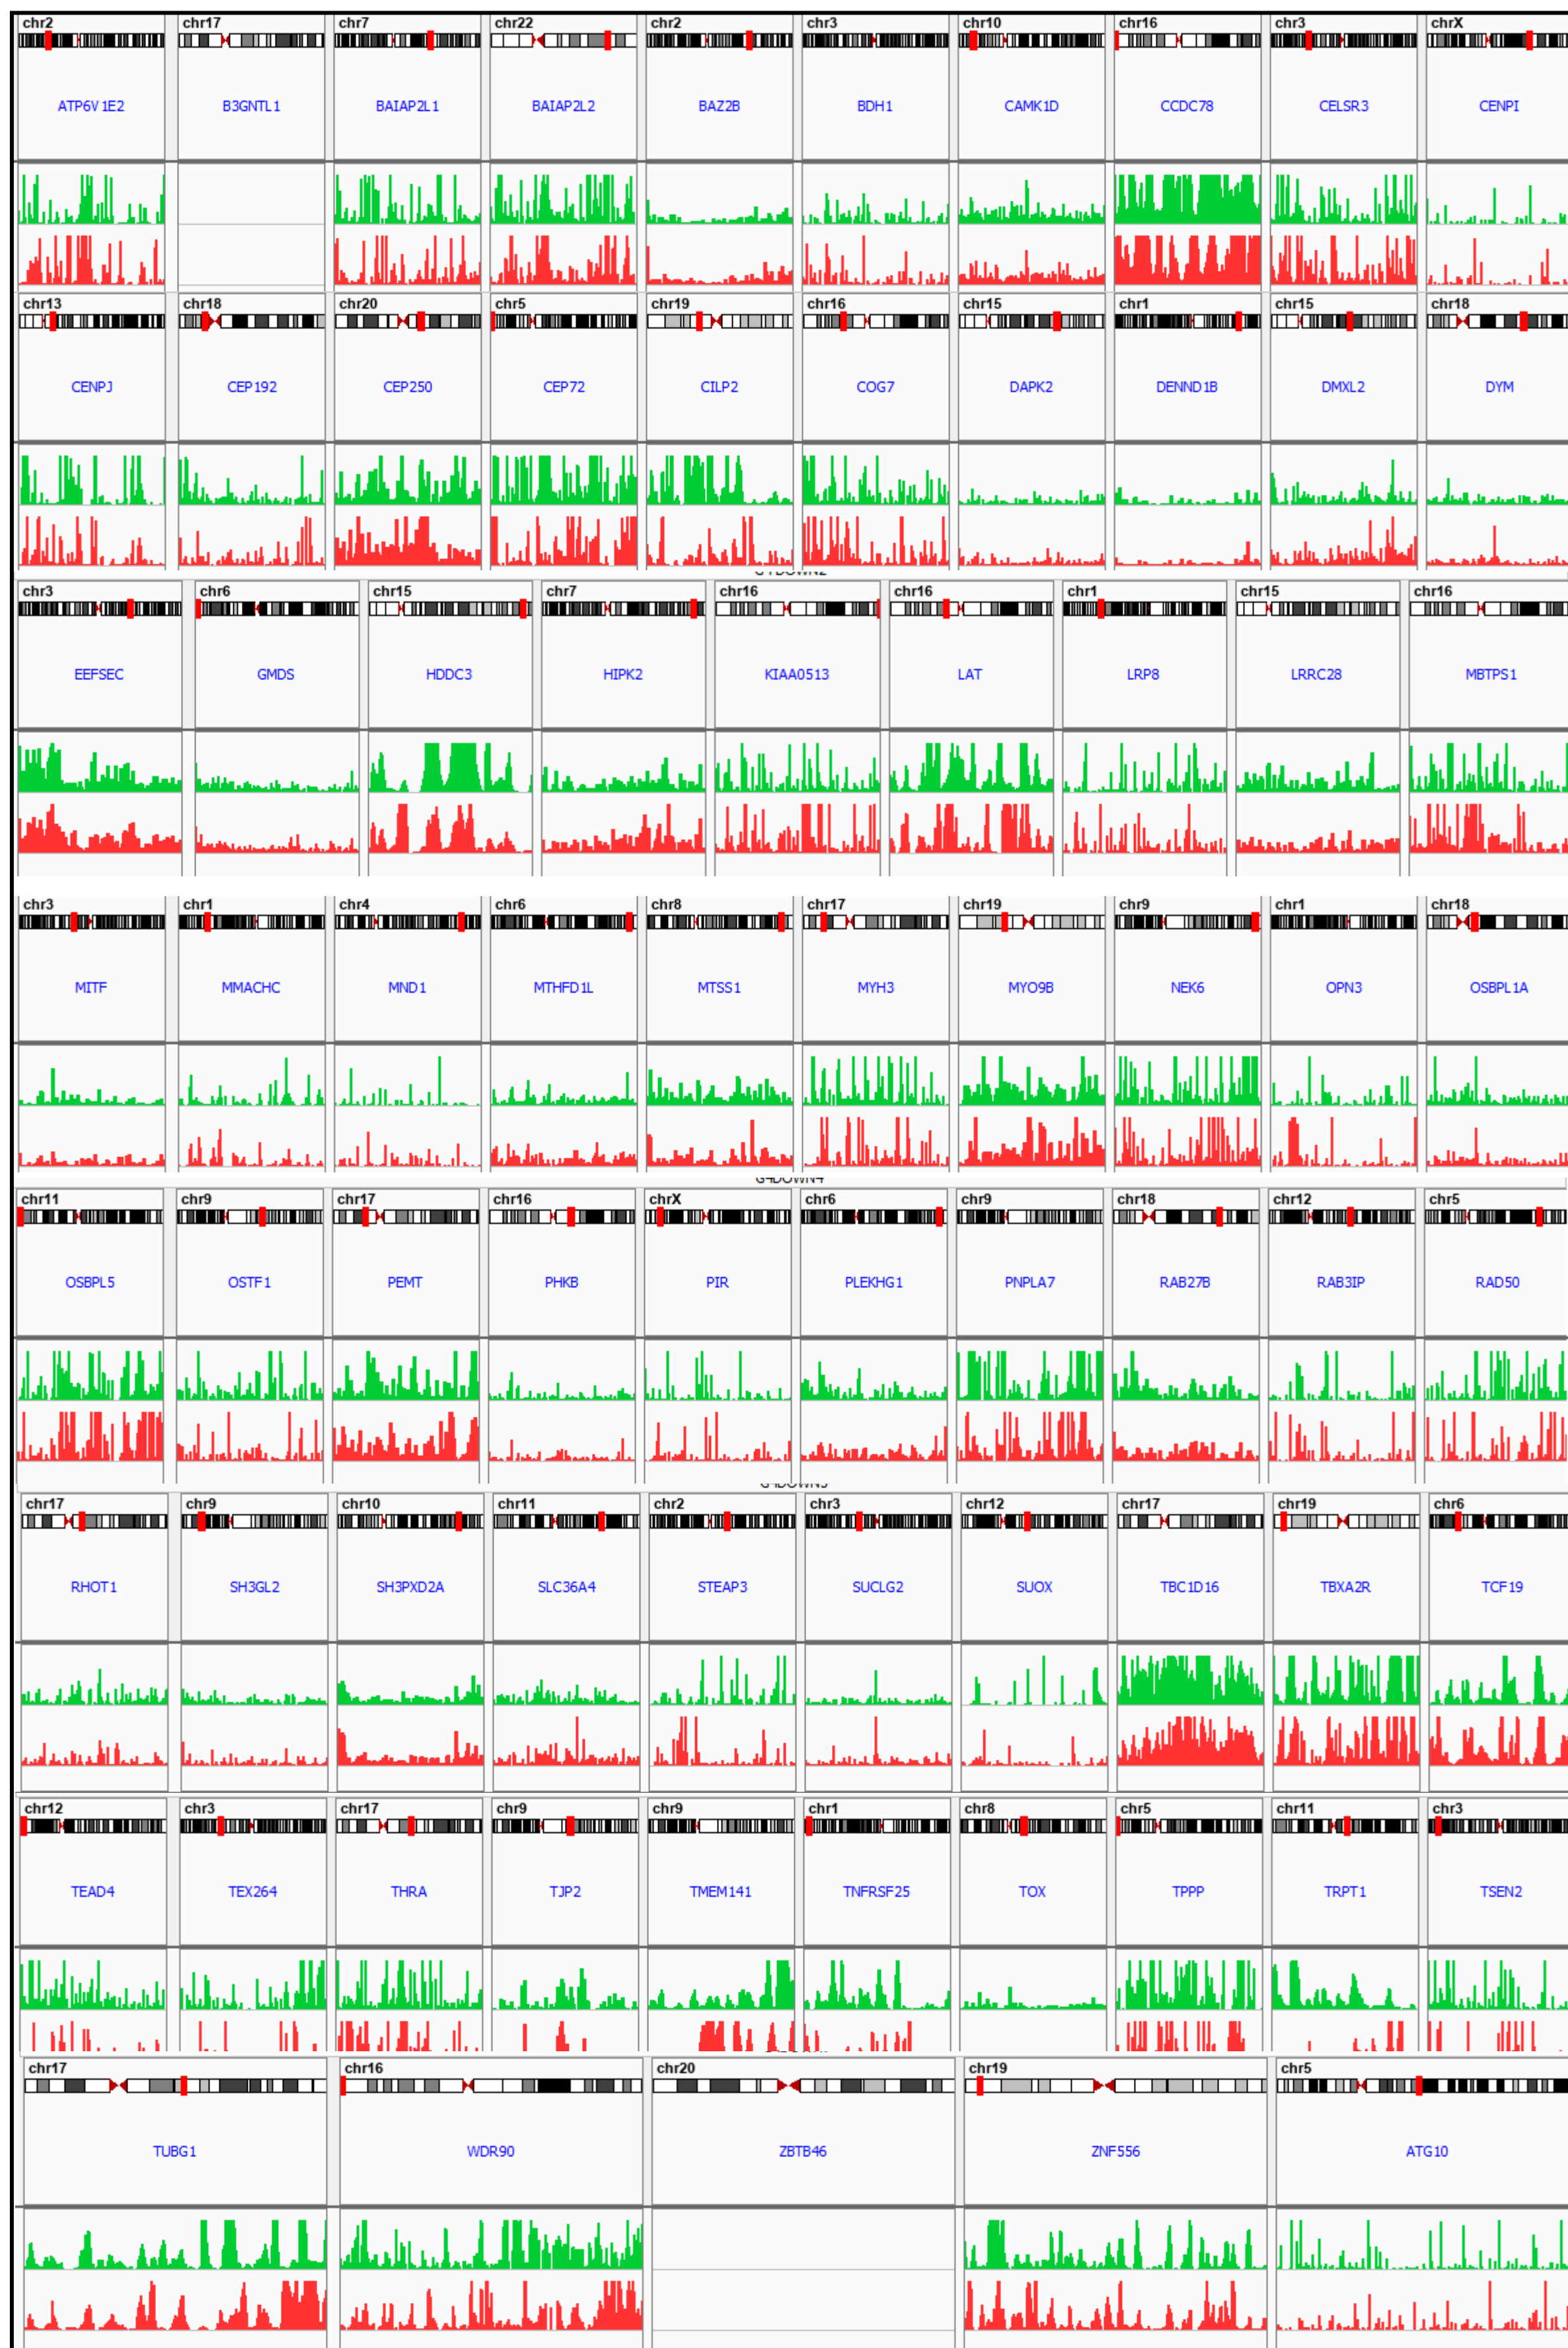

Supplementary Fig 2 A . Genes that are down regulated due to the influence of G quadruplex ligands which has a high propensity of G4s identified through Pyridostatin treated chip seq data. The Green peak represents the minus strand and Red peaks represent positive strand of each gene.

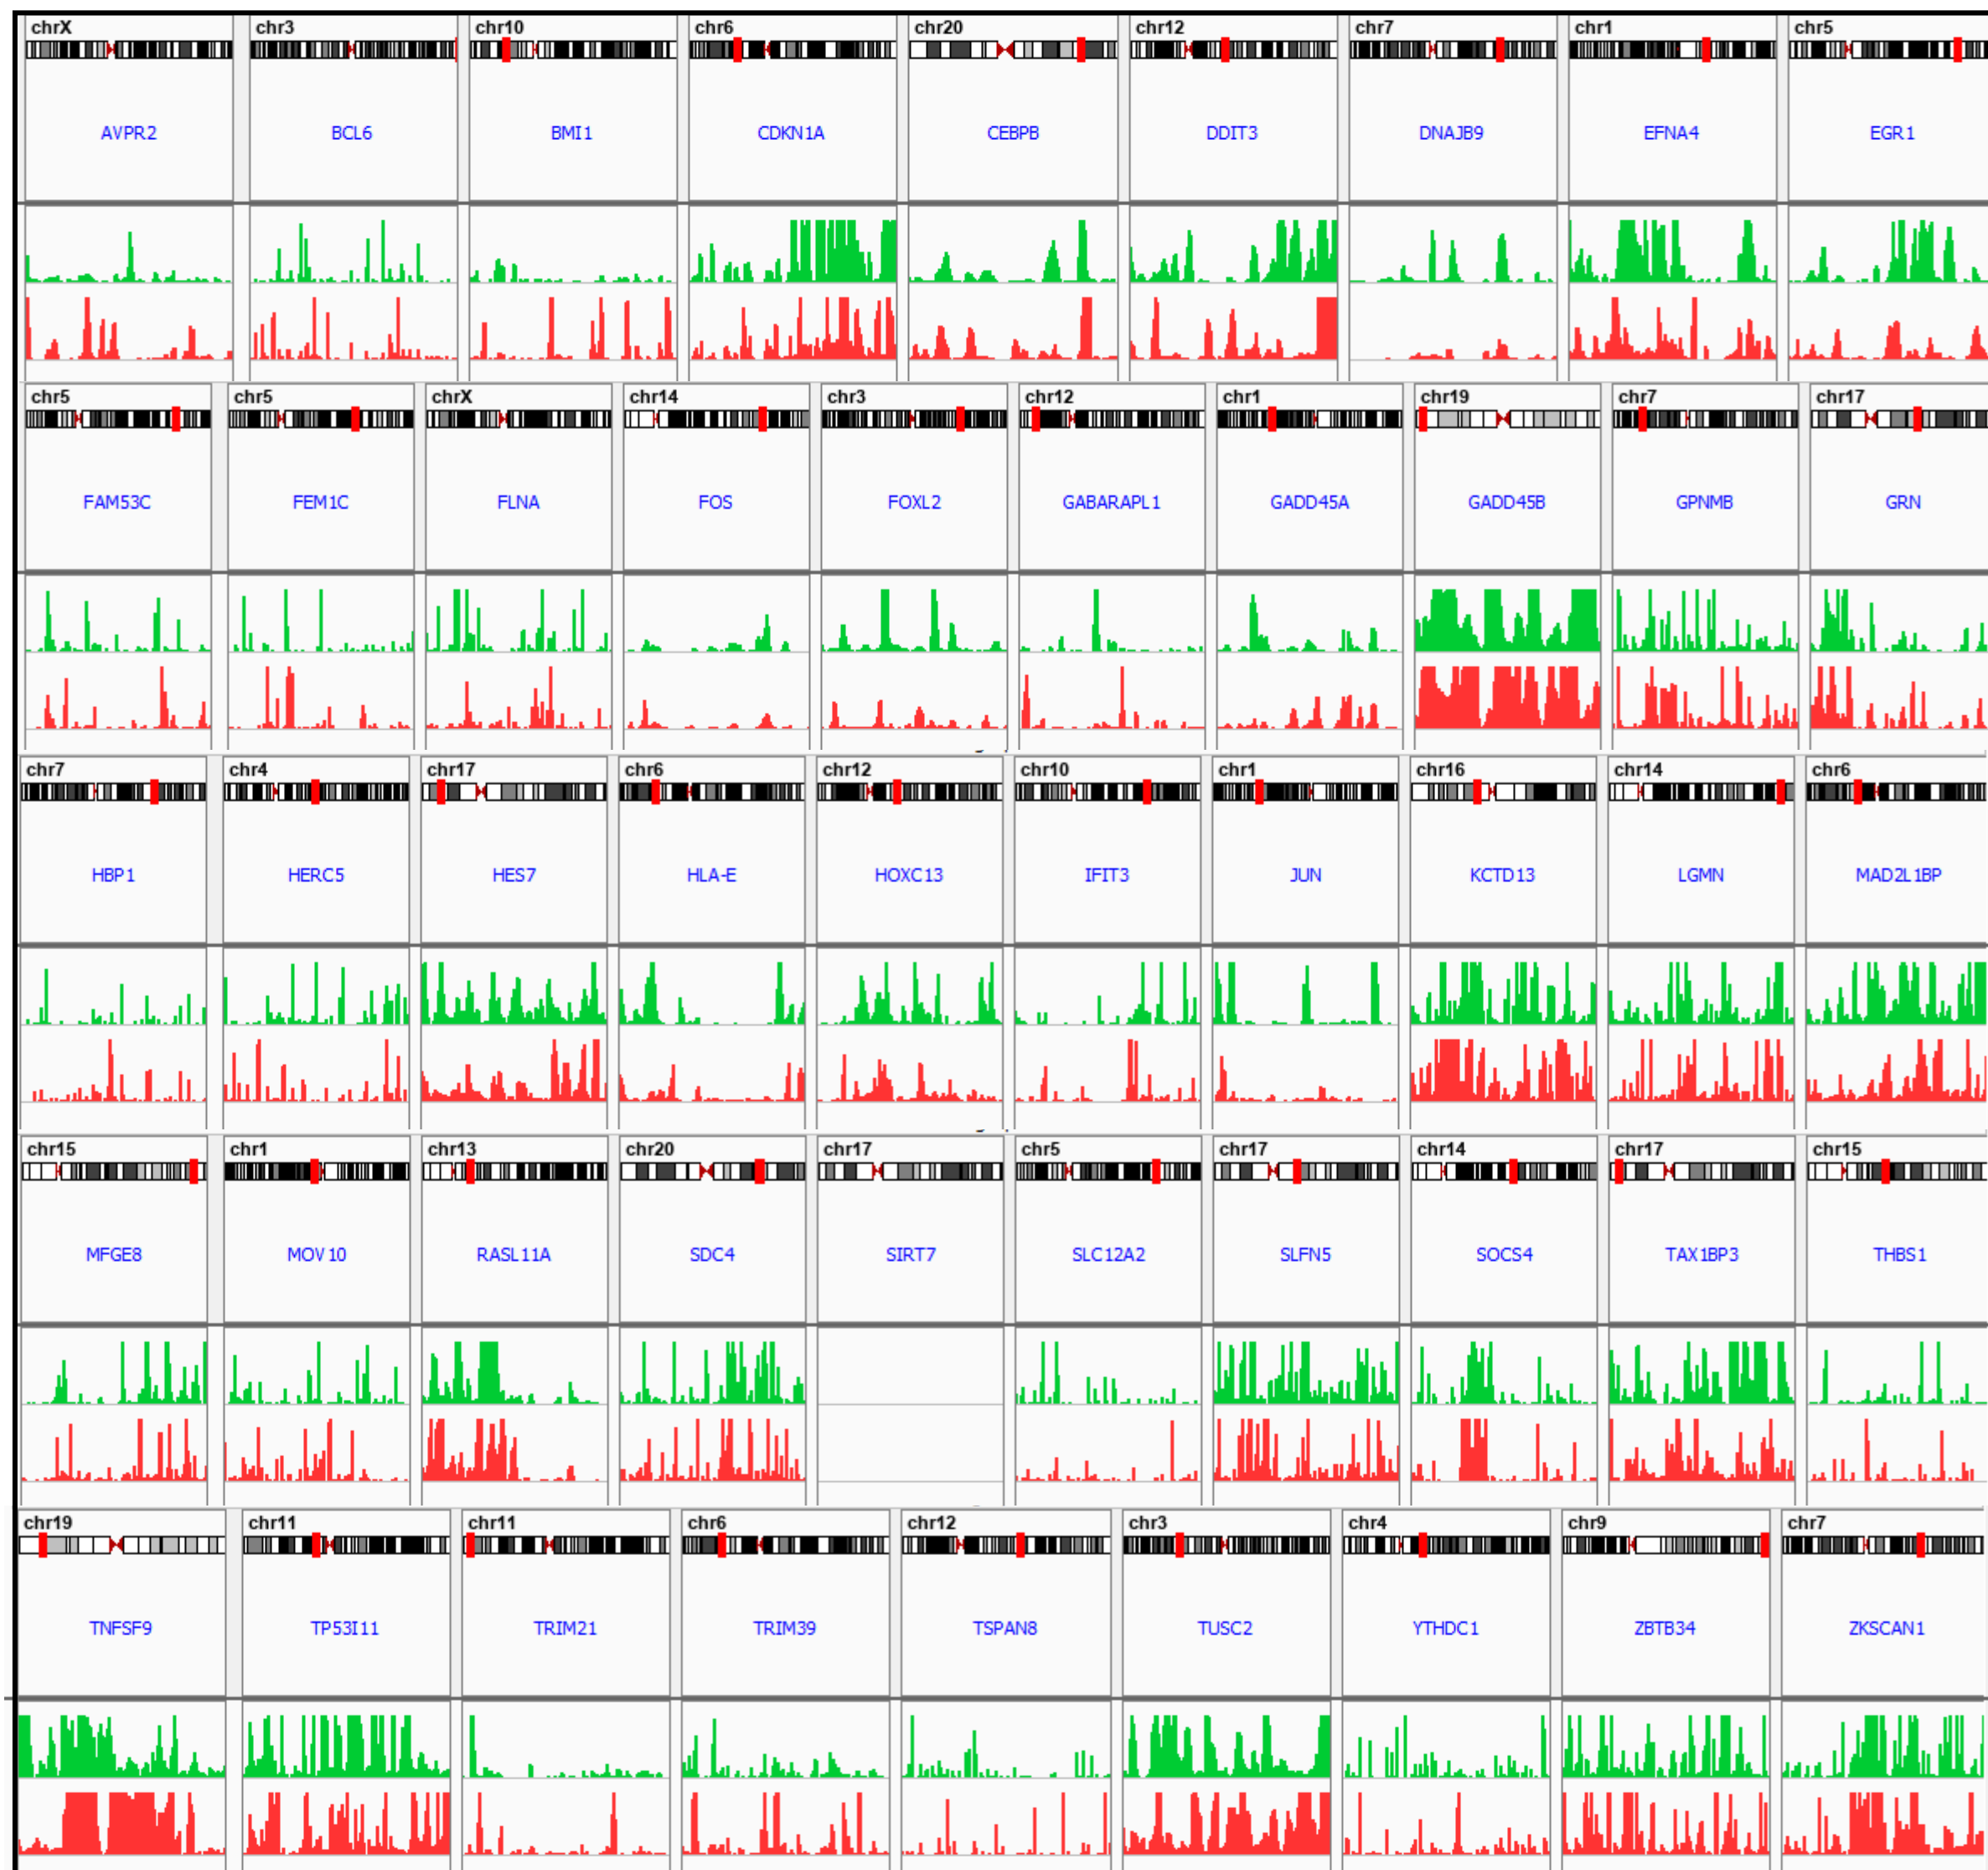

Supplementary Fig 2 B. Genes that are up regulated due to the influence of G quadruplex ligands which has a high propensity of G4s identified through a Pyridostatin treated chip seq data. The Green peak represents the minus strand and Red peaks represent positive strand of each gene.
