# Supplementary material
Source: PubMed Central journal article supplement (PMC8688671)

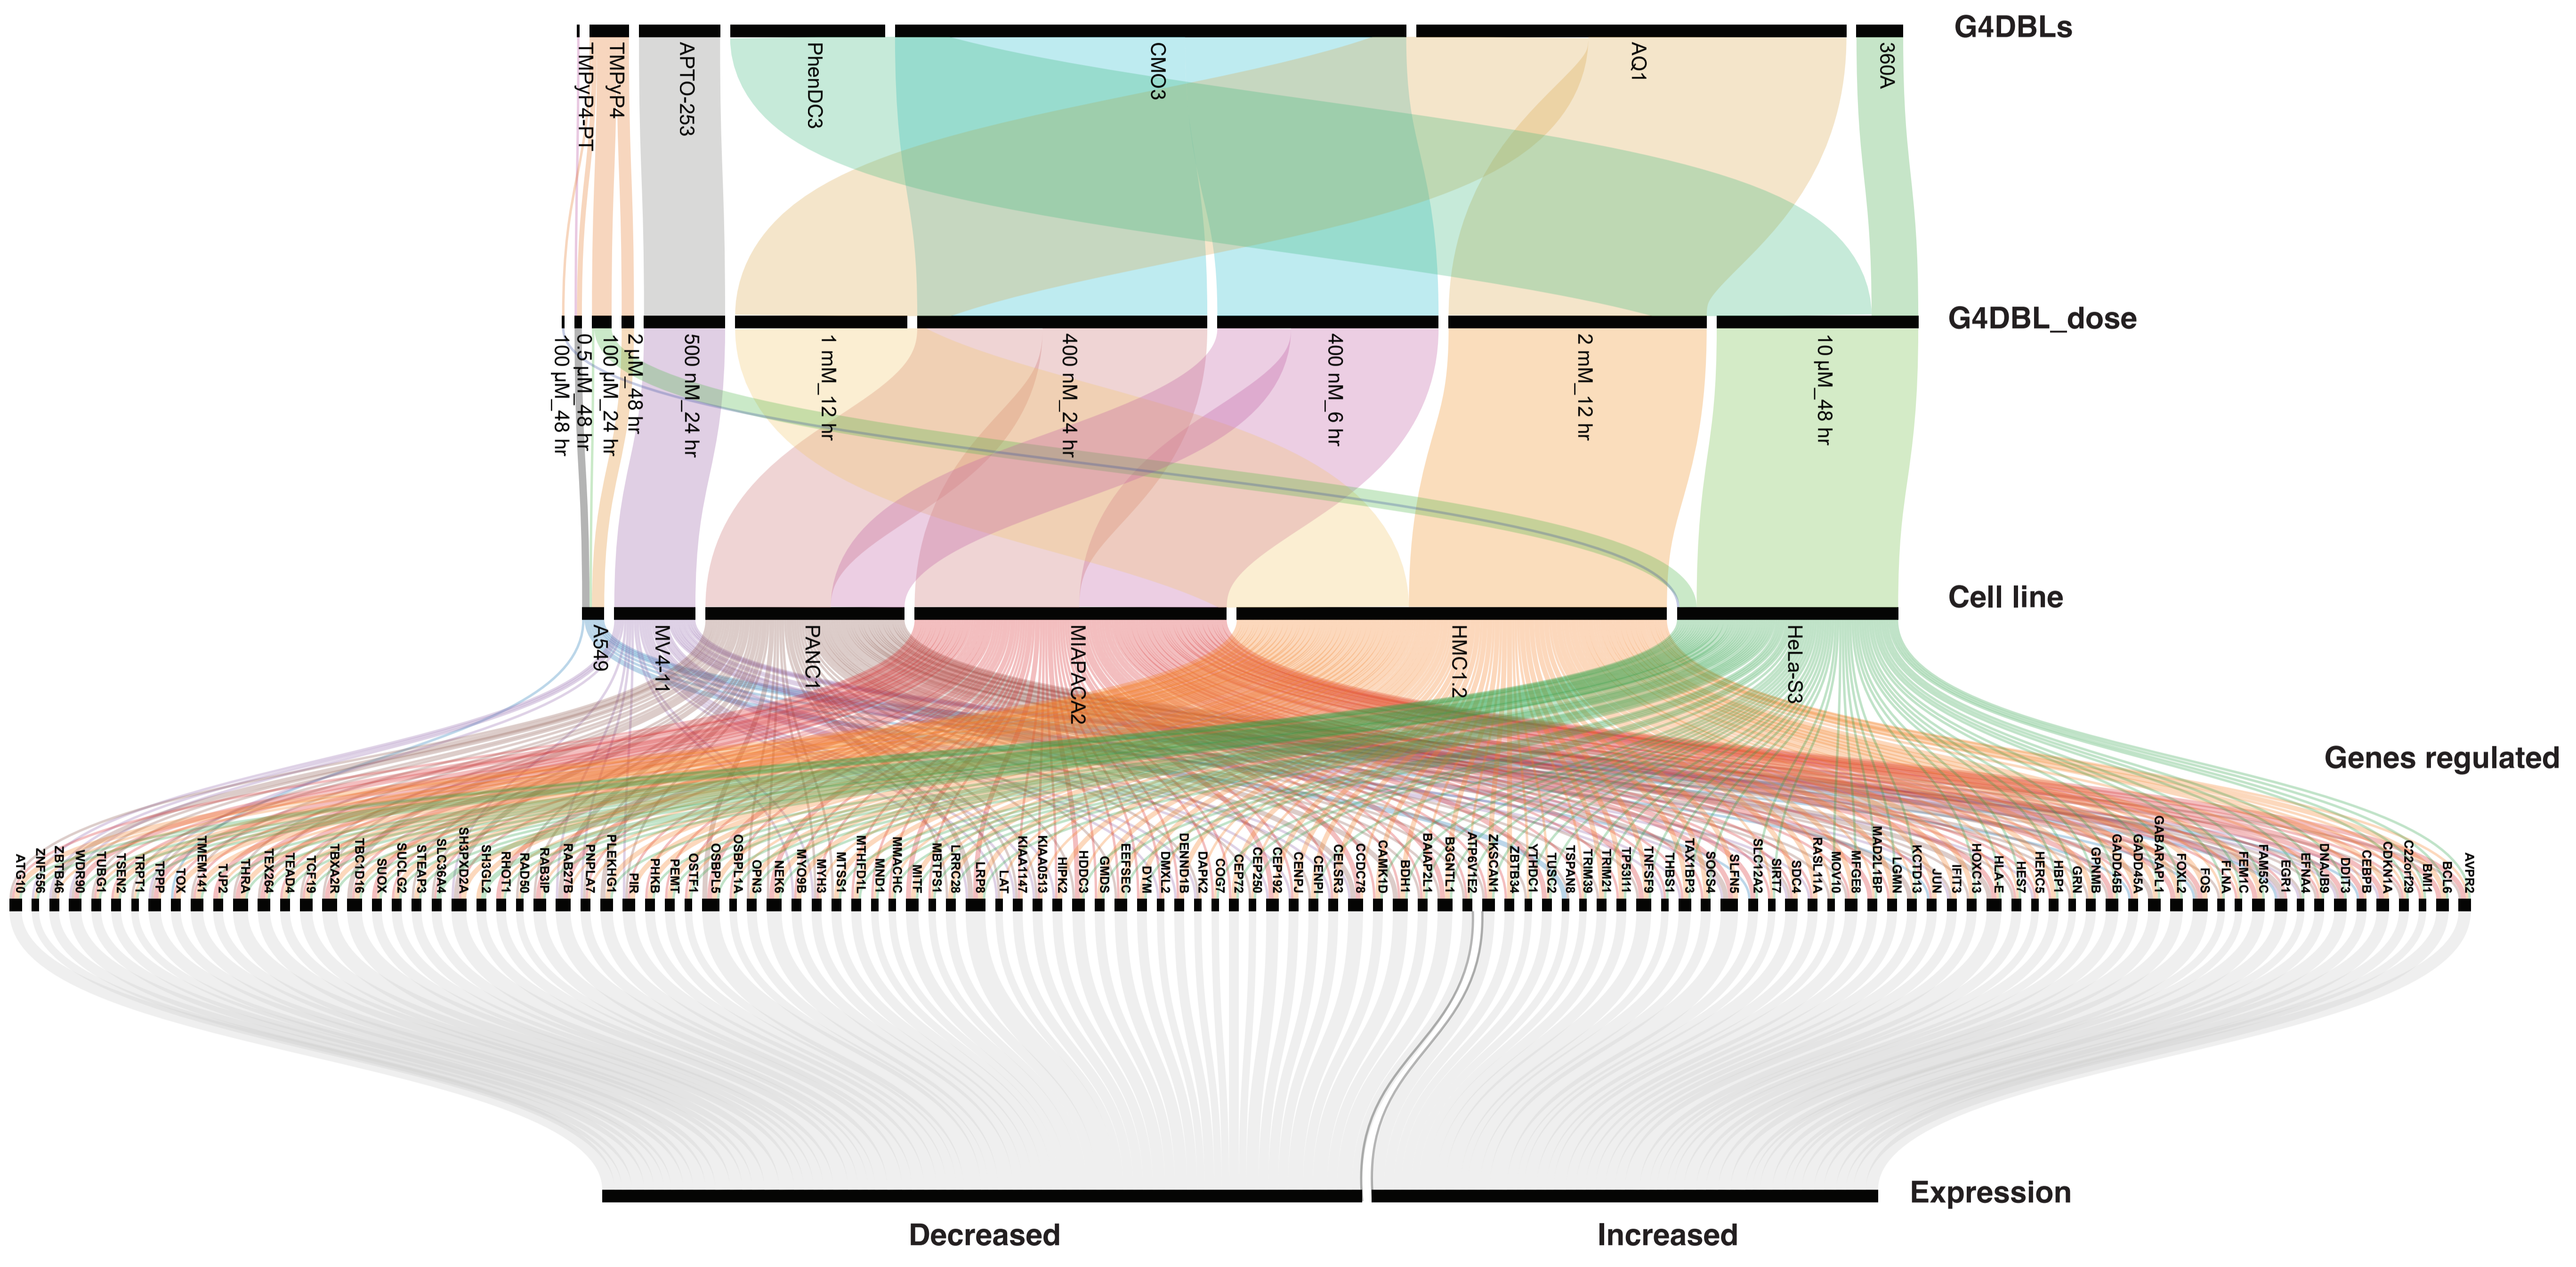

Supplement: 12079_2021_637_MOESM1_ESM.pdf [file 12079_2021_637_MOESM1_ESM.pdf]
